# Supplementary material for: Broad-Scale Phosphoprotein Profiling of Beta Adrenergic Receptor (β-AR) Signaling Reveals Novel Phosphorylation and Dephosphorylation Events
Source: PubMed Central journal article supplement (PMC3855414; doi:10.1371/journal.pone.0082164), 2013-12-05

Figure S1

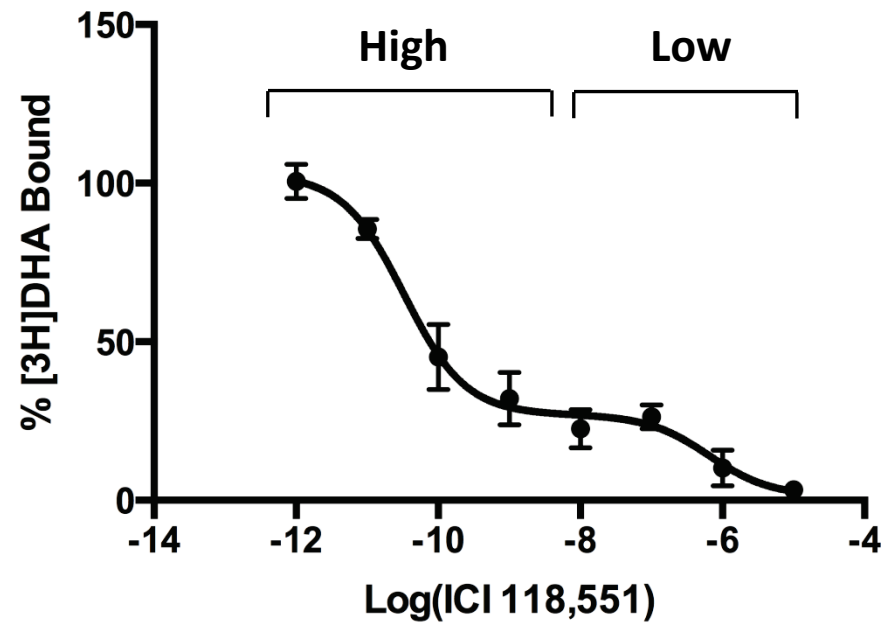

Figure S2

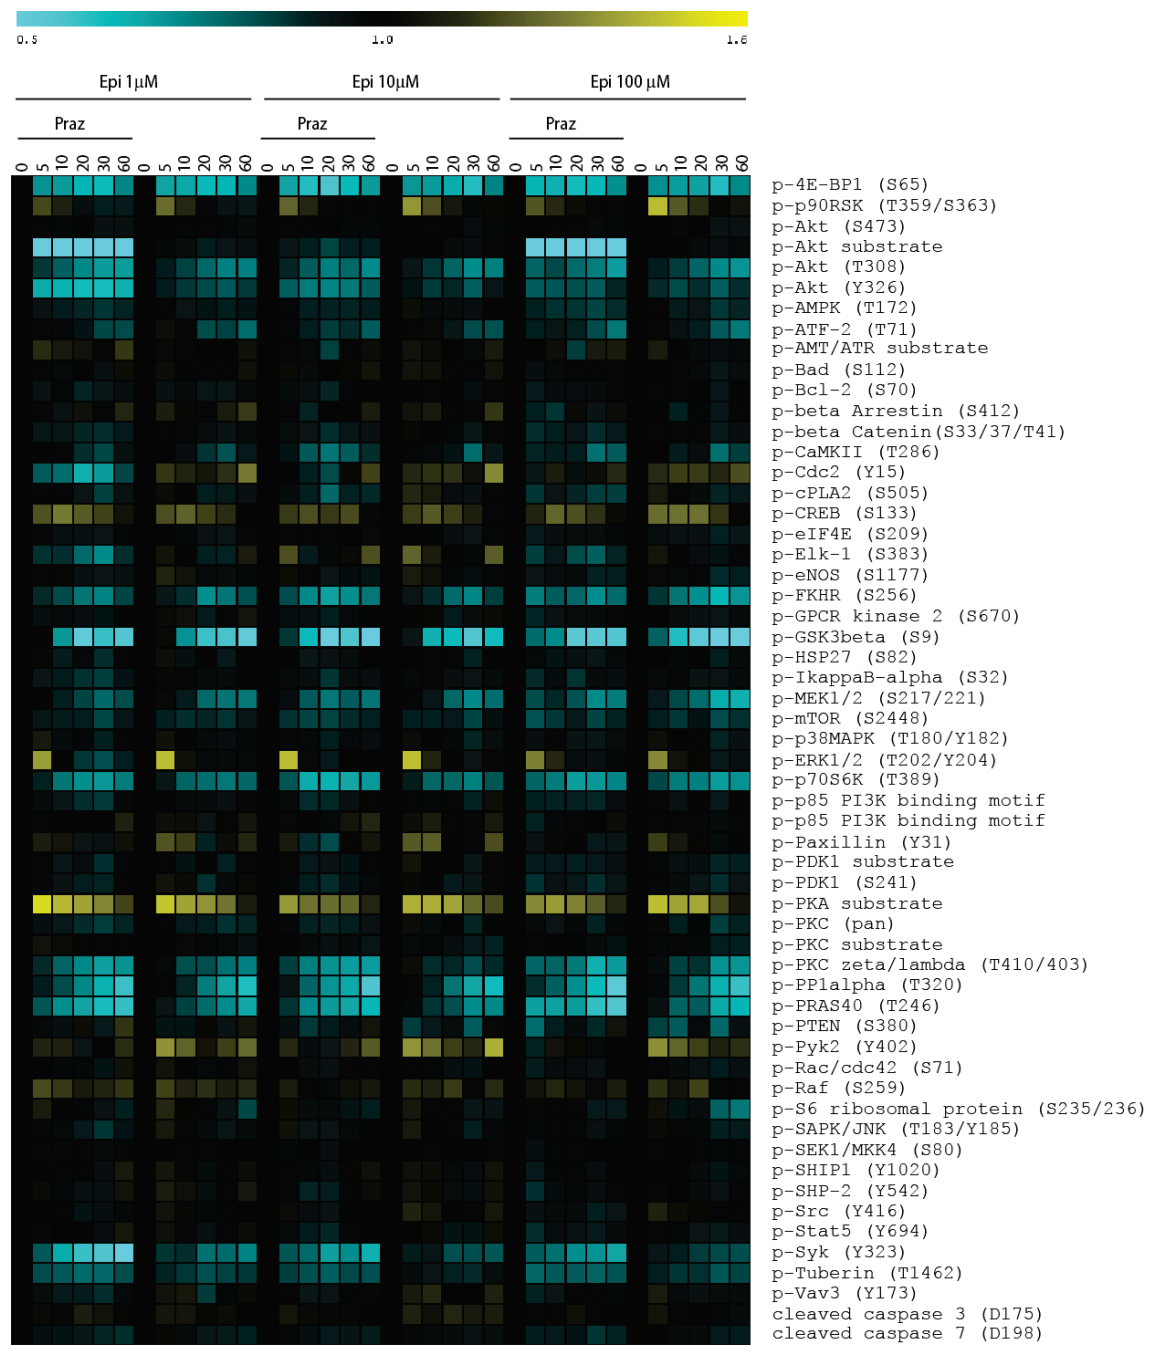

Figure S3

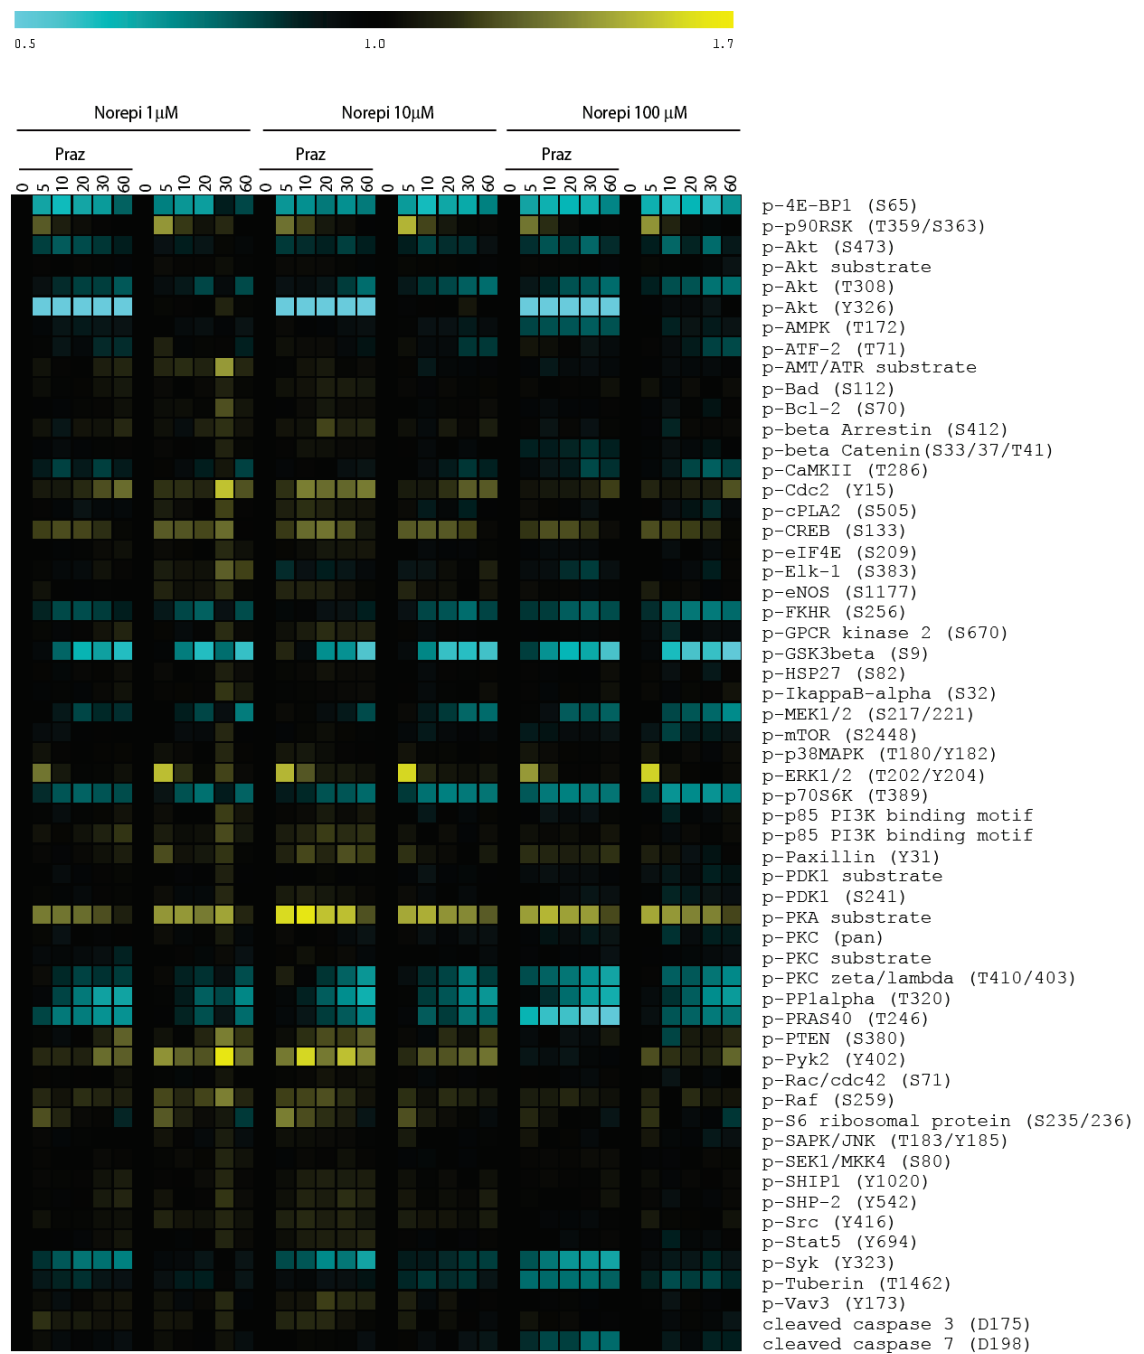



Figure S5

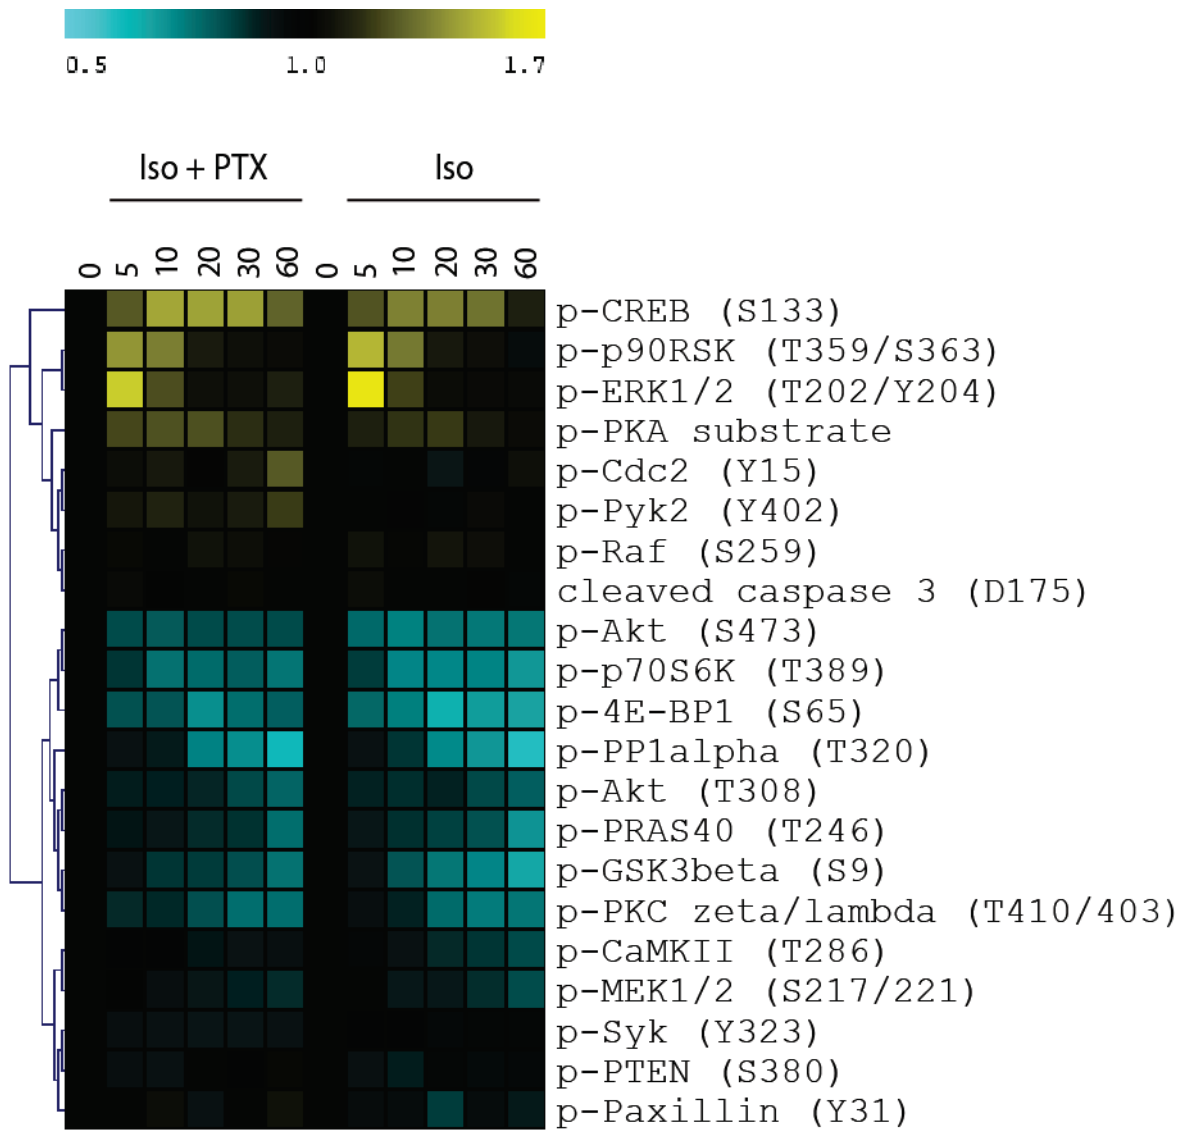

Figure S6

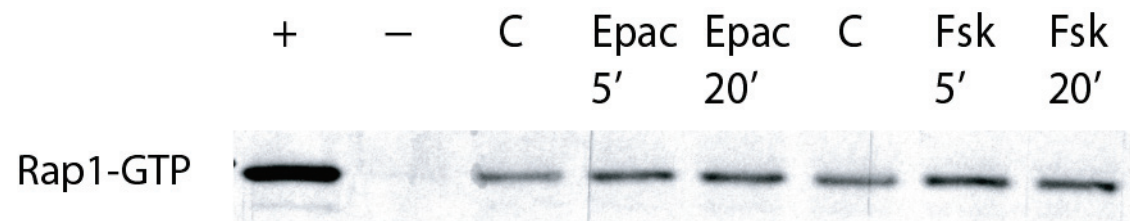

Supplement: pone.0082164.s001.pdf [file pone.0082164.s001.pdf]
